# Supplementary material for: First identification of the SARS-COV-2/XBB.1.5 sublineage among indigenous COVID-19 cases through the influenza sentinel surveillance system in Niger
Source: PubMed Central journal article supplement — Heliyon. 2023 Oct 19;9(11):e20916. doi: 10.1016/j.heliyon.2023.e20916 (PMC10637901; doi:10.1016/j.heliyon.2023.e20916), 2023-10-19
Supplement: mmc1.pdf [file mmc1.pdf]

Niamey le 2 avril 2009

**DELIBERATION N° 06/2009/CCNE**

**Objet** : Autorisation

**LE COMITE CONSULTATIF NATIONAL D'ETHIQUE REUNI  
A NIAMEY LE 2 avril 2009**

*Vu la Constitution du 9 août 1999 ;*

*Vu le Décret N°99-434/PCRN/MSP du 1<sup>er</sup> novembre 1999, portant création, attributions et composition du comité consultatif national d'éthique;*

*Vu le décret 2000-376 du 12 octobre 2000, portant nomination du Président du Comité Consultatif National d'Ethique*

*Vu le Décret N°2007-214/PRN du 3 juin 2007, portant nomination du Premier Ministre, Chef du Gouvernement;*

*Vu le Décret N°2007-216 /PRN du 9 juin 2007, portant nomination des membres du Gouvernement;*

*Vu le Décret N°2007-250 /PRN/MSP du 19 juillet 2007, déterminant les attributions du Ministre de la Santé Publique;*

*Vu le Décret N°2007-501/PRN/MSP/ du 08 novembre 2007, portant organisation du ministère de la Santé Publique,*

*Vu l'arrêté N°0187/MSP/CAB du 12 octobre 2000 modifiant l'arrêté N°043/MSP/CAB du 21 mars 2000 portant nomination des membres du Comité Consultatif National d'Ethique ;*

*Vu le protocole soumis le 18 mars 2009 par le CERMES sur « Surveillance épidémiologique par un réseau sentinelle de la grippe humaine (virus influenza) au Niger »;*

*Après avoir entendu les investigateurs principaux du projet, représentant le promoteur ;*

## **APRES DELIBERATION**

### **DECIDE**

**Article Premier** : Le CERMES est autorisé à conduire l'étude sur « Surveillance épidémiologique par un réseau sentinelle de la grippe humaine (virus influenza) au Niger ».

**Article 2** : Le promoteur est tenu de prendre en compte les observations formulées par le comité lors de sa session notamment, corriger les coquilles, aérer la page de garde, suppression de la page 2, la prudence dans l'élargissement des sites sentinelles, compléter la partie éthique avec le consentement du sujet pour le prélèvement, faire un glossaire, définition des cas avant les critères d'inclusion, la population de Niamey a une couverture vaccinale contre la méningite non négligeable.

**Article 3** : Le promoteur doit fournir au comité les rapports d'étapes de l'exécution de l'enquête ainsi qu'une copie du document final contenant les résultats de l'étude

**Article 4** : La présente décision sera communiquée partout où besoin sera.

#### **Ampliations :**

|        |      |
|--------|------|
| MSP    | ATCR |
| SG/MSP | info |
| Chrono | 1    |

*Pour le comité consultatif national d'éthique*

**Docteur GAGARA MAGAGI**
