# Supplementary material for: First identification of the SARS-COV-2/XBB.1.5 sublineage among indigenous COVID-19 cases through the influenza sentinel surveillance system in Niger
Source: PubMed Central journal article supplement — Heliyon. 2023 Oct 19;9(11):e20916. doi: 10.1016/j.heliyon.2023.e20916 (PMC10637901; doi:10.1016/j.heliyon.2023.e20916), 2023-10-19
Supplement: mmc2.pdf [file mmc2.pdf]

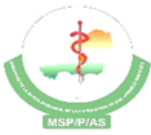**FORMULAIRE POUR LA SURVEILLANCE DE LA GRIPPE ET  
AUTRES INFECTIONS RESPIRATOIRES AIGUES**

Site sentinelle : ..... Date de la consultation : /...../...../...../ Heure /...../  
 Nom du clinicien : ..... N° ID (par le labo) :

**Consentement :** Accepterez-vous que votre échantillon soit testé pour la grippe O  N  Autres virus O  N

**Définition des cas** (Les signes cliniques à la consultation doivent dater de moins de 10 jours pour toute inclusion)

Date de début des signes : /...../...../...../ Température ( $\geq 38^{\circ}\text{C}$ ) : Oui  Non  , si oui mentionnez la  
 température relevée: |\_|\_|, |\_|\_|°C \*Si Température  $< 38^{\circ}\text{C}$  antécédent de température dans les 12H Oui  Non  
 Toux : Oui  Non  Autres signes: Oui  Non  , Si oui mentionnez les ?  
 ..... Date de prélèvement nasopharyngé : /...../...../...../

**Identification du patient**

Nom : ..... Prénom : .....

Sexe :  Homme  Femme Si sexe femme – Enceinte ? :  Oui  Non

Date de naissance : /...../...../...../ OU Age : |\_| |ans (si âge  $\leq$  à 2 ans, âge en mois) |\_| |mois

**Adresse de résidence du patient**

Ville : ..... Commune..... Quartier : ..... Téléphone : .....

**Séjour hors du Niger**

Le patient a-t-il voyagé hors du Niger il y a moins d'un mois ?  Oui  Non  Ne sait pas

Si Oui dans quel pays ? : ..... Combien de temps a-t-il séjourné ? .....

**Maladies chroniques préexistantes**

Maladie cardiaque  Maladie respiratoire chronique  Troubles hématologiques chroniques  Diabète

Asthme  Sujet immunodéprimé  Cardiopathie chronique  Autres.....

**Traitement administré**

Antipyrétique  Antibiotiques  Corticoïdes  Fluidifiants bronchiques  Antiasthéniques

Vacciner contre la grippe :  Oui  Non Autres : .....

**Issu du patient**

Le patient est-il hospitalisé ou doit-il être hospitalisé ?  Oui (cas d'IRAS)  Non (cas de SG)

Le patient est-il ?  Guéri  Référé  Décédé / Cause et date décès : ...../...../...../

**Résultats de laboratoire** (A remplir par le personnel du laboratoire)

Réception prélèvement: /...../...../...../

Méthode d'analyse :  rRT-PCR  Culture virale  Autres : .....

Résultats d'analyse :  Négatif (Inf A et B)  Positif Inf A :  A/H3N2  A/H1N1pdm  Inf A indéterminé

Positif Inf B :  B Yamagata  B Victoria  Inf B indéterminé

Autres virus : SARS-CoV-2 :  Pos  Neg

RSV :  Pos  Neg

Date d'analyse : /...../...../...../

Signature du Responsable du LNR :
